# Supplementary material
Source: publisher site journal article supplement (https://www.dovepress.com/article/429957)
Supplement: Supplementary file 1 [file get_supplementary_file.php]

Table S1. Clinical features of training sets and validation sets.

| Variable | Training (n=722) | Validation (n=217) | *P* Value |
| --- | --- | --- | --- |
| Age (year, ±s) | 64.34±11.74 | 64.90±11.39 | 0.533 |
| Male, n (%) | 491 (68.0) | 144(66.4) | 0.650 |
| Smoking, n (%) | 260(36.0) | 85(39.2) | 0.397 |
| Hypertension, n (%) | 407(56.4) | 126(58.1) | 0.659 |
| Systolic pressure (mmHg, ±s) | 133.80±21.62 | 133.50±21.10 | 0.858 |
| Diastolic pressure (mmHg, ±s) | 79.73±13.63 | 79.12±12.77 | 0.562 |
| Neutrophil count (109/L) | 6.16 (4.58-8.40) | 6.59 (4.83-8.99) | 0.099 |
| Monocyte count (109/L) | 0.54±0.56 | 0.55±0.85 | 0.923 |
| Platelet count (109/L) | 207.05±65.18 | 209.15±59.77 | 0.671 |
| Red blood cell (109/L) | 4.61±0.57 | 4.65±0.60 | 0.368 |
| Hemoglobin (g/L) | 140.38±17.34 | 139.20±15.79 | 0.372 |
| Hematocrit (%) | 42.44±5.39 | 42.87±5.32 | 0.303 |
| RDW (%) | 12.87±1.05 | 12.92±1.07 | 0.507 |
| PDW (%) | 14.38±2.55 | 14.11±2.37 | 0.158 |
| Total cholesterol (mmol/L) | 4.30±1.44 | 4.30±1.33 | 0.962 |
| Triglycerides (mmol/L) | 1.77±1.50 | 1.81±1.43 | 0.798 |
| High-density lipoprotein (mmol/L) | 1.06±0.31 | 1.08±0.33 | 0.247 |
| Low-density lipoprotein (mmol/L) | 2.76±0.94 | 2.76±0.94 | 0.987 |
| Lipoprotein (A) (mg/L) | 278.30±195.69 | 271.78±177.38 | 0.660 |
| Fasting blood glycemia (mmol/L) | 6.80 (6.08-8.86) | 7.08 (6.08-9.13) | 0.224 |
| Total bilirubin (µmol/L) | 14.91±8.99 | 14.33±7.18 | 0.384 |
| Direct bilirubin (µmol/L) | 5.39±3.90 | 4.98±3.20 | 0.160 |
| Blood urea nitrogen (mmol/L) | 5.99±2.18 | 6.07±2.19 | 0.626 |
| eGFR (mL/min/1.73 m2) | 109.75 (90.86-129.09) | 108.12 (91.39-124.17) | 0.374 |
| Uric acid (µmol/L) | 316.46±103.42 | 313.21±94.93 | 0.679 |
| medication, n (%) |  |  |  |
| Aspirins | 718(99.4) | 216(99.5) | 0.869 |
| Clopidogrel/Ticagrelor | 716(99.2) | 214(98.6) | 0.465 |
| Stains | 691(95.7) | 202(93.1) | 0.117 |
| ACEI/ARB | 442(61.2) | 145(66.8) | 0.135 |
| Beta-blockers | 621(86.0) | 184(84.8) | 0.653 |
| Nitrates | 393(54.4) | 115(53.0) | 0.710 |
| LMWH | 503(70.0) | 156(71.9) | 0.530 |
| Diuretics | 330(45.7) | 110(50.7) | 0.197 |
| TyG index | 9.00±0.77 | 9.31±0.72 | 0.284 |
| PNI | 48.06±8.28 | 48.07±6.72 | 0.984 |

**Abbreviations:** CI-AKI, contrast-induced acute kidney injury; TyG, triglyceride-glucose; PNI, prognostic nutritional index; RDW, red blood cell volume distribution width; PDW, platelet distribution width; eGFR, estimated glomerular filtration rate; ACEI, angiotensin converting enzyme inhibitor; ARB, angiotensin receptor inhibitor; LMWH, low molecular weight heparin.
